# Supplementary material for: Nanoformulation Design Including MamC-Mediated Biomimetic Nanoparticles Allows the Simultaneous Application of Targeted Drug Delivery and Magnetic Hyperthermia
Source: MDPI journal article supplement (doi:10.3390/polym12081832), 2020-08-15
Supplement: s1 [file s1]

## Supporting Information

# Nanoformulation Design Including MamC-Mediated Biomimetic Nanoparticles Allows the Simultaneous Application of Targeted Drug Delivery and Magnetic Hyperthermia

Ylenia Jabalera<sup>1,†</sup>, Francesca Oltolina<sup>1,†</sup>, Ana Peigneux<sup>1</sup>, Alberto Sola-Leyva<sup>2</sup>, Maria P. Carrasco-Jiménez<sup>2</sup>, Maria Prat<sup>3,4,5,6,7,8,\*</sup>, Concepcion Jimenez-Lopez<sup>1,\*</sup> and Guillermo R. Iglesias<sup>9</sup>

<sup>1</sup> Department of Microbiology, Faculty of Sciences, University of Granada, 18071 Granada, Spain; yjabalera@ugr.es (Y.J.); foltolina@ugr.es (F.O.); apn@ugr.es (A.P.); cjl@ugr.es (C.J.-L.);

<sup>2</sup> Department of Biochemistry and Molecular Biology I, University of Granada, 18071 Granada, Spain; albertosola@ugr.es (A. S.-L.); mpazcj@ugr.es (M.P. C-J).

<sup>3</sup> Dipartimento di Scienze della Salute, Università del Piemonte Orientale “A. Avogadro”, Via Solaroli 17, 28100 Novara, Italy; maria.prat@med.uniupo.it (M.P.);

<sup>4</sup> Centro di Biotecnologie per la Ricerca Medica Applicata (BRMA), Via Solaroli 17, 28100 Novara, Italy

<sup>5</sup> Consorzio Interuniversitario per Biotecnologie (CIB), Località Padriciano 99, 34149 Area di Ricerca, Italy

<sup>6</sup> Consorzio Interuniversitario Nazionale per la Scienza e Tecnologia dei Materiali (INSTM), Via G. Giusti 9, 50121 Firenze, Italy

<sup>7</sup> Consorzio Interuniversitario di Ricerca in Chimica dei Metalli nei Sistemi Biologici (CIRCMSB), Piazza Umberto I, 1, 70121 Bari, Italy

<sup>8</sup> Centro Interdipartimentale di Medicina Rigenerativa (CIMeR), Via Montpellier, 1, 00133 Roma, Italy

<sup>9</sup> Department of Applied Physics, Faculty of Sciences, University of Granada, 18071 Granada, Spain; iglesias@ugr.es (G.R.I.).

\* Correspondence: cjl@ugr.es (C.J.-L.) (+34-958-249-833); maria.prat@med.uniupo.it (M.P.) (+39-0321-660-662)



**Figure S1.** Colloidal stability of the samples measured using photographs of the sedimentation time evolution.

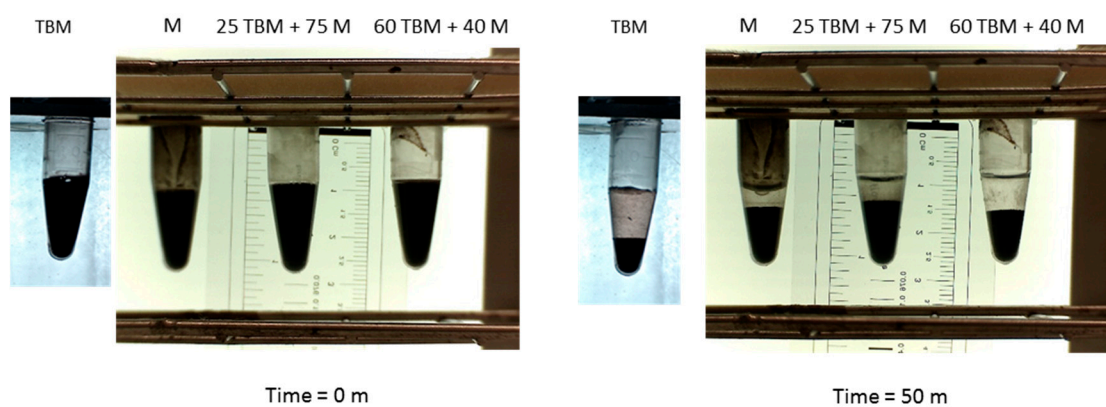

Video x 150 (1 frame = 150 s)

Total video time 20s
